# Supplementary material for: Exogenous nitric oxide stimulates the odontogenic differentiation of rat dental pulp stem cells
Source: Sci Rep. 2018 Feb 21;8:3419. doi: 10.1038/s41598-018-21183-6 (PMC5821879; doi:10.1038/s41598-018-21183-6)
Supplement: Supplementary file 1 — Supplementary Information [file 41598_2018_21183_MOESM1_ESM.pdf]

## **Supplementary Information**

### **Exogenous nitric oxide stimulates the odontogenic differentiation of rat dental pulp stem cells**

Soichiro Sonoda, Yu-feng Mei, Ikiru Atsuta, Atsushi Danjo, Haruyoshi Yamaza, Shion Hama, Kento Nishida, Ronghao Tang, Yukari Nakamura-Kyumoto, Norihisa Uehara, Toshio Kukita, Fusanori Nishimura, Takayoshi Yamaza

## **Supplementary Methods**

### **Colony-forming units-fibroblastic (CFU-F) assay**

CFU-F assay was performed as described previously (Yamaza et al. 2011). Briefly, isolated cells from rat dental pulp tissues were seeded at  $1-10 \times 10^3$  per dish on 60 mm culture dishes. Fourteen days after the seeding, the cultures were treated with a mixture of 2% paraformaldehyde and 0.1% toluidine blue. Number of colonies containing 50 cells < cells were counted with Axio Imager M2 microscope (Carl Zeiss Microscopy, Jena, Germany).

### **Bromo-deoxyuridine (BrdU) incorporation assay**

rDPSCs (P1,  $1 \times 10^3$ ) on 35-mm dishes were treated with BrdU reagent (1:100, Thermo Fisher Scientific, Waltham, MA) for 24 hours. BrdU-positive cells were detected by using BrdU staining kit (Thermo Fisher Scientific). BrdU-positive nuclei were observed with Axio Imager M2 microscope (Carl Zeiss Microscopy), and were quantified according to the previous report (Yamaza et al. 2010).

### **Flow cytometric analysis**

rDPSCs (P1) at 50-60% confluent were removed. The cells ( $0.1 \times 10^6$ ) were stained with R-phycoerythrin-conjugated anti-human CD29, CD45 and CD90 antibodies (each 1  $\mu$ g) (BioLegend, San Diego, CA) in 100  $\mu$ l of flow cytometry buffer containing 2% heat-activated FBS (Equitech-Bio, Kerrville, TX) in PBS for 45 min on ice. The stained cells were washed for 5 min at 3 times, and were measured on FACSVerse flow cytometer (BD Bioscience, Franklin Lake, NJ). The sub-class-matched antibodies (BioLegend) were used as the controls. The number

(percentage) of positive cells in  $10 \times 10^3$  was determined using FACSuite software (BD Bioscience) in comparison with the corresponding control cells stained with corresponding subclass-matched antibody in which a false-positive rate of less than 1% was accepted (Yamaza et al. 2010).

### **Multi-differentiation assay**

***in vitro* odontogenic assay.** rDPSCs (P1,  $3 \times 10^5$ ) were seeded on 35-mm dishes, and cultured until they reached confluence, and were induced in an osteogenic medium. The osteogenic medium was consisted of  $\alpha$ MEM (Thermo Fisher Scientific) containing 20% FBS (Equitech-Bio), 2 mM  $\beta$ -glycerophosphate (Sigma-Aldrich, St Louis, MO), 100 mM L-ascorbic acid 2-phosphate (Wako Pure Chemicals, Osaka, Japan), 10 nM dexamethasone (Dex) (Sigma-Aldrich), 2 mM L-glutamine (Nacalai Tesque, Kyoto, Japan), 55  $\mu$ M 2-ME, and penicillin/streptomycin-mixed antibiotics (Nacalai Tesque) for 6 weeks. For mineralized nodule detection, the cultures were stained with 1% Alizarin red-S (Sigma-Aldrich) in distilled water, and observed with Primovert microscope (Carl Zeiss Microscopy).

***in vitro* chondrogenic assay.** For chondrogenic differentiation, cell pellets of rDPSCs (P1,  $1.0 \times 10^6$ ) were cultured with a chondrogenic medium containing Dulbecco's Modified Eagle Medium (Thermo Fisher Scientific) with 15% FBS (Equitech-Bio), 2 mM L-glutamine (Nakalai Tesque), 1% insulin-transferrin-selenium (ITS) (Corning, Corning, NY), 100 nM dexamethasone (Sigma-Aldrich), 100 mM L-ascorbic acid 2-phosphate (Wako Pure Chemicals), 2 mM sodium pyruvate (Nakalai Tesque), 1 ng/ml TGF- $\beta_3$  (Peprotech, Rocky Hill, NJ), and penicillin/streptomycin-mixed antibiotics (Nacalai Tesque). Four weeks after the induction, the samples were fixed with 4% paraformaldehyde in PBS, pH 7.4. The paraffin sections were cut, and treated with alcian blue staining using alcian blue staining solution (Poly Scientific, Bay Shore, NY). The sections were observed with Axio Imager M2 microscope (Carl Zeiss Microscopy).

***in vitro* adipogenic assay.** P1 MSCs were cultured in an adipogenic inductive medium containing  $\alpha$ MEM (Thermo Fisher Scientific) with 15% FBS (Equitech-Bio), 2 mM L-glutamine (Nakalai Tesque), 0.5 mM isobutyl-methylxanthine (Sigma-Aldrich), 60 mM indomethacin (Sigma-Aldrich), 0.5 mM hydrocortisone (Sigma-Aldrich), 10 mM insulin (Sigma-Aldrich), and 100 U/ml penicillin and

penicillin/streptomycin-mixed antibiotics (Nacalai Tesque). Six weeks after the induction, they were fixed with 4% paraformaldehyde in PBS for 10 min, and stained for lipid droplet with 0.3% Oil red O (Sigma-Aldrich) in isopropanol. The cultures were observed with Primovert microscope (Carl Zeiss Microscopy).

### **Cell viability assay**

rDPSCs (P1) were cultured on 96-well multiplates for 1, 2, 3, or 5 days with or without NOC-18 (10  $\mu$ M) (Dojindo Laboratories, Kumamoto, Japan) and carboxy-PTIO (100  $\mu$ M) (Dojindo Laboratories). The cell viability was examined using WST-8 cell count kit (Dojindo Laboratories) according to the manufacturer's instructions, and was measured at 450 nm with Multiscan GO spectrophotometer (Thermo Fisher Scientific).

### **Morphology**

rDPSCs (P1) were cultured in the presence or absence of NOC-18 (10  $\mu$ M) (Dojindo Laboratories) for 3 days, and were fixed with 4% paraformaldehyde in 0.1 M phosphate buffer (PB), pH 7.4, for 15 min at room temperature. They were incubated with periodate (4.2 mM) (Nacalai Tesque) for 30 min at 4°C, and were stained with fluorescein-5-thiosemicarbazide (0.1 mM) (Thermo Fisher Scientific) at 37°C for 120 min. The cells were observed with Zeiss Axio Imager M2 microscope (Carl Zeiss Microscopy).

### **Measurement of NO<sub>2</sub><sup>-</sup> in conditioned medium**

NO was measured as NO<sub>2</sub><sup>-</sup> products in the conditioned medium of rDPSC cultures. rDPSCs (P1) were cultured on 24-well multiplates for 48 h with or without NOC-18 (10  $\mu$ M) (Dojindo Laboratories) and carboxy-PTIO (100  $\mu$ M) (Dojindo Laboratories). The conditioned mediums were collected and used for measuring NO<sub>2</sub><sup>-</sup> using NO<sub>2</sub>/NO<sub>3</sub> Assay Kit-CII (Colorimetric) ~Geiss Reagent Kit~ (Dojindo Laboratories) at 540 nm with Multiscan GO spectrophotometer (Thermo Fisher Scientific). Nitrite level was normalized with protein amount, which was measured using Protein assay (Bio-Rad, Hercules, CA) at 595 nm with Multiscan GO spectrophotometer (Thermo Fisher Scientific).

Total cellular proteins were determined using the BCA protein assay (Thermo Fisher Scientific) by measuring the absorbance at 595 nm. ALP activity values were normalized to the relative concentrations of total cellular protein.

NO was measured as nitrite

### **Supplementary References**

1. Yamaza, T. *et al.* Mouse mandible contains distinctive mesenchymal stem cells. *J. Dent. Res.* **90**: 317-324 (2011).
2. Yamaza, T. *et al.* Immunomodulatory properties of stem cells from human exfoliated deciduous teeth. *Stem Cell Res. Ther.* **1**: 5 (2010).

**Supplementary Table 1.** TaqMan probes used in this study.

| Gene name                                                         | Assay ID      |
|-------------------------------------------------------------------|---------------|
| alkaline phosphatase ( <i>Alp</i> )                               | Rn01516028_m1 |
| bone gamma-carboxyglutamic acid-contains protein ( <i>Bglap</i> ) | Rn00566386_g1 |
| bone sialoprotein ( <i>Bsp</i> )                                  | Rn00561414_m1 |
| collagen, type I, alpha 1 ( <i>Col1a1</i> )                       | Rn01463848_m1 |
| dentin matrix protein 1 ( <i>Dmp1</i> )                           | Rn01450122_m1 |
| dentin sialophospho protein ( <i>Dspp</i> )                       | Rn02132391_s1 |
| nuclear factor kappa B subunit 2 ( <i>Nfkb2</i> )                 | Rn01413842_g1 |
| runx-related transcription factor 2 ( <i>Runx2</i> )              | Rn01512298_m1 |
| tumor necrosis factor alpha ( <i>Tnfa</i> )                       | Rn01525859_g1 |

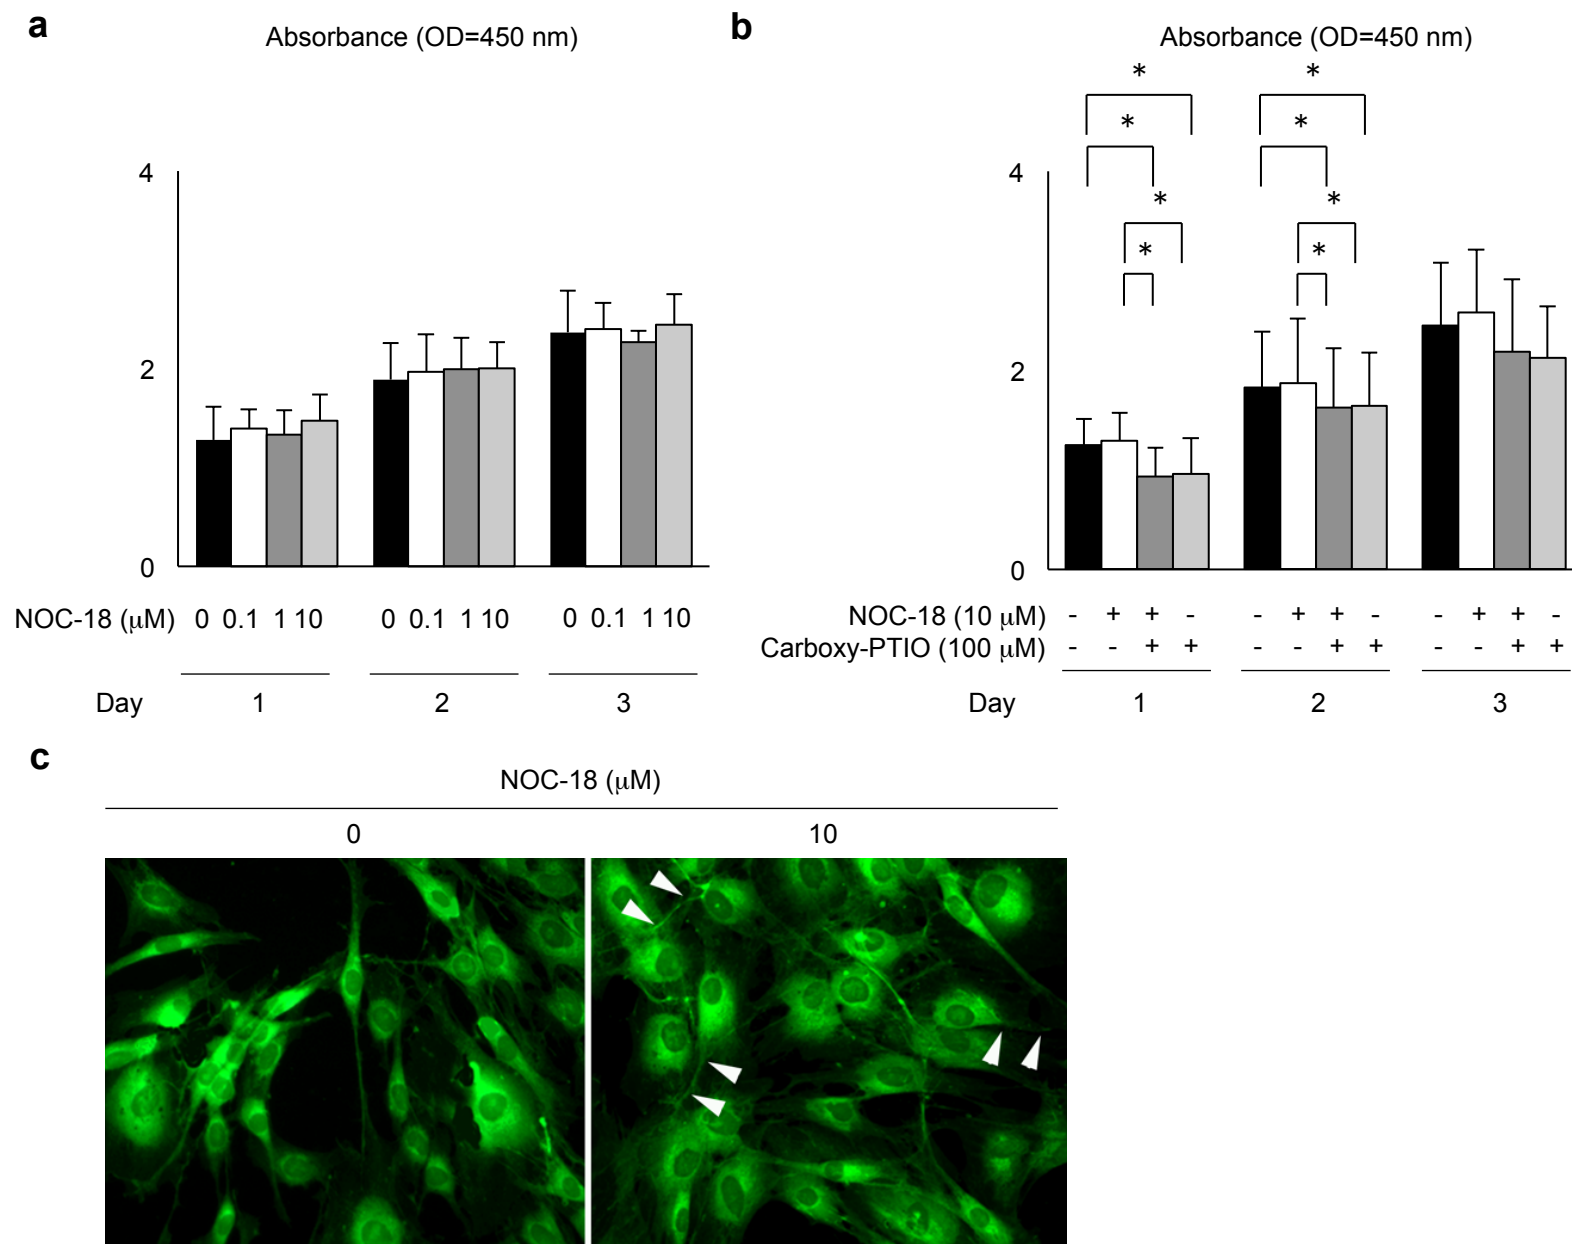

**Supplementary Figure 1. Effects of a NO donor, NOC-18, on the cell viability and cellular morphology of rDPSCs.** (a) Effects of NOC-18 on cell viability of rDPSCs. (b) Effects of carboxy-PTIO on cell viability of rDPSCs. (a, b)  $n=3$  per group. \*:  $p<0.05$ . Graph bars show the means  $\pm$  SEM. (c) Effects of NOC-18 on cellular morphology of rDPSCs. Cell membrane staining. White arrowheads: a long cytoplasmic process.

**a**

*Col1a1/18S*

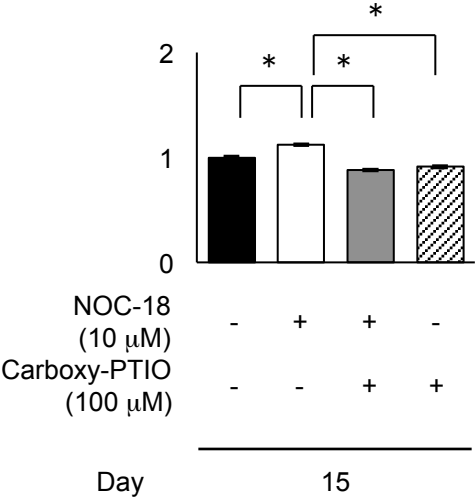

**b**

*Bsp/18S*

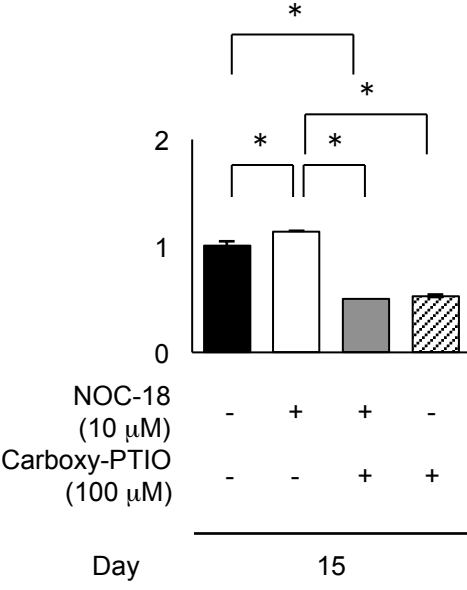

**Supplementary Figure 2. Effects of NOC-18 and carboxy-PTIO on gene expression of type I collagen and bone siaoprotein in rDPSCs.** rDPSCs were cultured in an odontogenic condition with NOC18 (10  $\mu$ M) and/or carboxy-PTIO (100  $\mu$ M). **(a, b)** Real-time RT-PCR assay of type I collagen, type 1, alpha1 (*Colla1*) **(a)** and bone siaoprotein (*Bsp*) genes **(b)**. n=3 per group. Each levels normalized to 18S ribosomal RNA (*18S*) in each sample. Graph bars show the means  $\pm$  s.e.m. \*:  $p < 0.05$ .

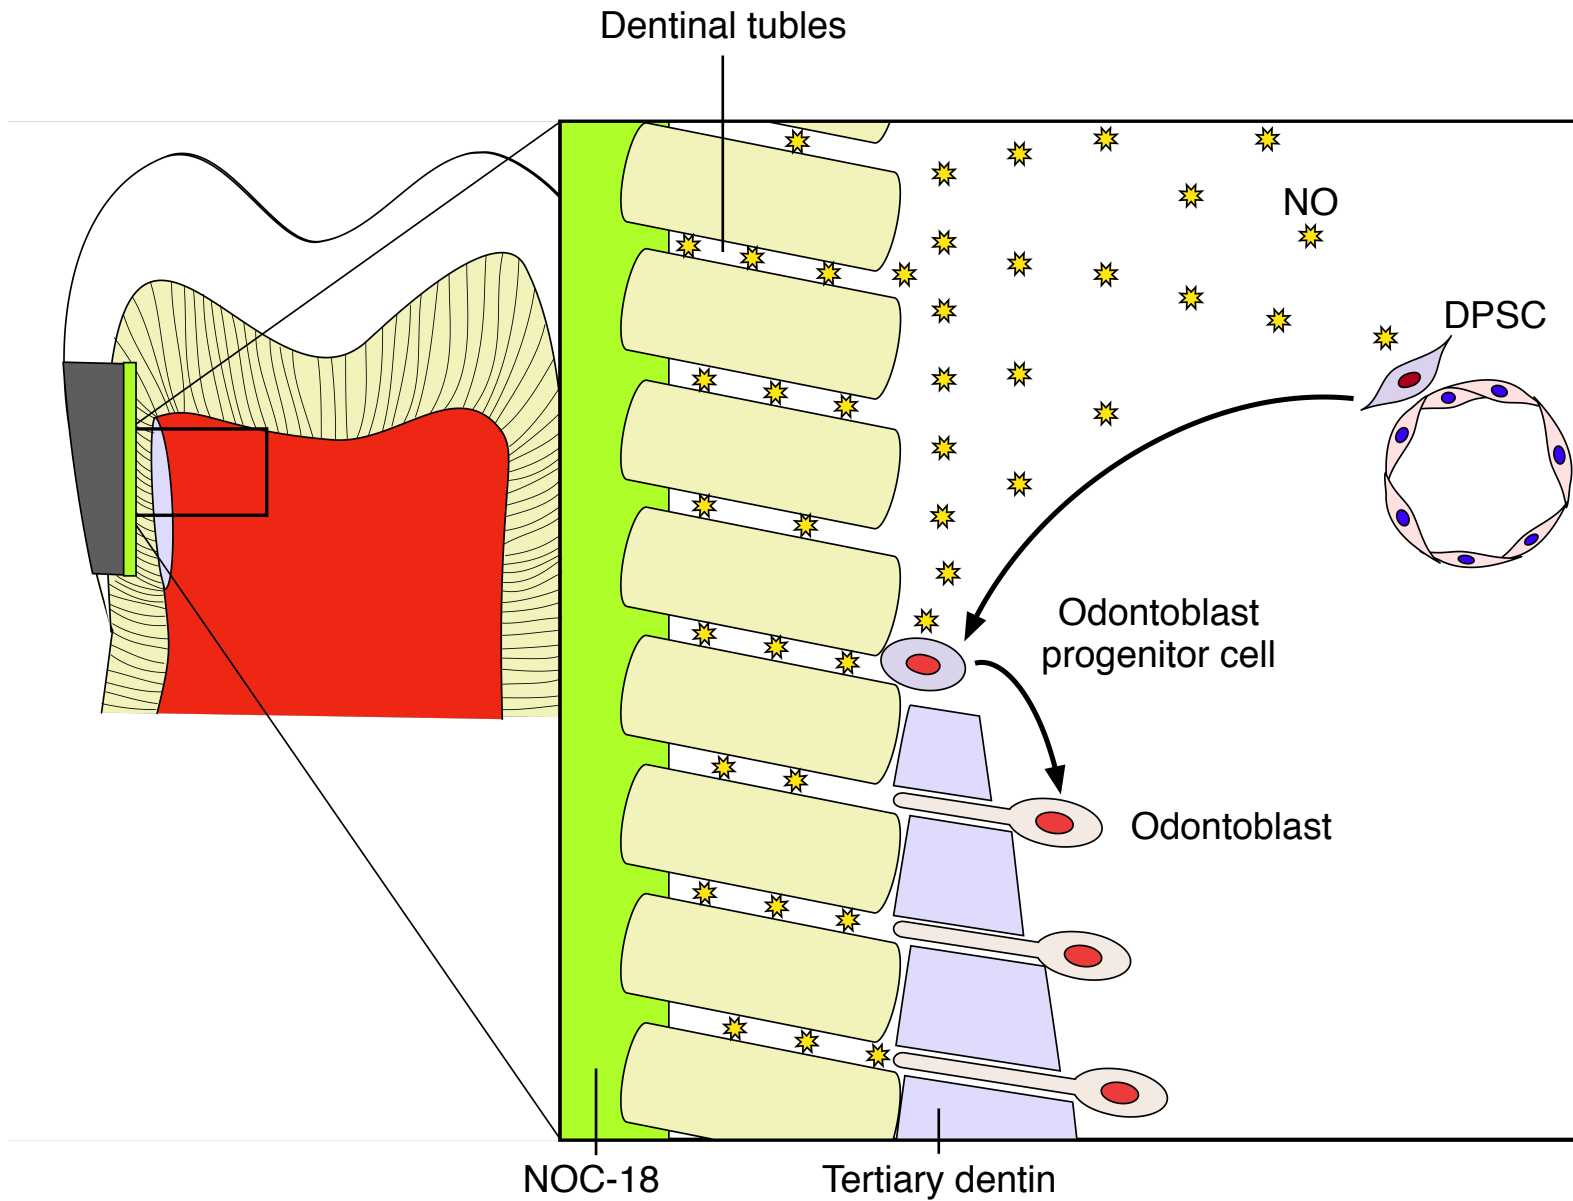

**Supplementary Figure 3. Pulp capping application of NOC-18 on the cutting dentin.** After tooth preparation, DPSCs are recruited from the perivascular niche to the interface between the injured dentin and dental pulp tissue, resulting in being differentiated into mature odontoblasts to form tertiary dentin. NOC-18-released nitric oxide (NO) spreads in dental pulp tissue beneath the cavity through the dentinal tubules, and accelerates the odontogenic differentiation of the recruited DPSCs.
